# Supplementary material
Source: PubMed Central journal article supplement (PMC2989343)
Supplement: NIHMS212542-supplement-01.pdf [file NIHMS212542-supplement-01.pdf]

### Supplemental Material: Elemental Analysis

| Compound | Formula                | Calcd. |      |       | Found |      |        |
|----------|------------------------|--------|------|-------|-------|------|--------|
|          |                        | C      | H    | N     | C     | H    | N      |
| 5        | $C_{15}H_{16}N_2O_2$   | 70.29  | 6.29 | 10.93 | 70.33 | 6.37 | 10.99  |
| 6        | $C_{12}H_{10}N_2O_2$   | 67.28  | 4.71 | 13.08 | 67.20 | 4.73 | 13.11  |
| 7        | $C_{17}H_{22}N_2O_6S$  | 53.39  | 5.80 | 7.33  | 53.35 | 5.79 | 7.26   |
| 8        | $C_{13}H_{13}BrN_2O_2$ |        |      |       |       |      |        |
|          | HBr. $H_2O$            | 38.26  | 4.20 | 6.86  | 38.27 | 4.18 | 7.20   |
| 10       | $C_{16}H_{24}BrN_3O_2$ |        |      |       |       |      |        |
|          | $H_2O$                 | 49.49  | 6.75 | 10.82 | 49.54 | 6.66 | 10.82  |
| 12       | $C_{21}H_{26}BrN_3O_2$ |        |      |       |       |      |        |
|          | $1/2H_2O$              | 57.14  | 6.17 | 9.52  | 57.48 | 6.52 | (8.95) |
| 14       | $C_{22}H_{28}BrN_3O_2$ | 59.19  | 6.32 | 9.41  | 58.96 | 6.41 | 9.25   |
| 16       | $C_{24}H_{32}BrN_3O_2$ |        |      |       |       |      |        |
|          | $H_2O$                 | 58.54  | 6.95 | 8.53  | 58.49 | 6.77 | 8.54   |
| 18       | $C_{31}H_{38}BrN_3O_2$ |        |      |       |       |      |        |
|          | $1/2H_2O$              | 64.92  | 6.85 | 7.33  | 64.77 | 6.91 | 7.35   |
